# Supplementary material
Source: PubMed Central journal article supplement (PMC3235476)
Supplement: NIHMS328412-supplement-Supplementary.pdf [file NIHMS328412-supplement-Supplementary.pdf]

## Supplemental Information

**Table S1.** Behavioral Ethogram: Mother-Infant Behavioral Scoring System

| Behaviors Measured for Duration of Occurrence  |                                                                                                                                                                             |
|------------------------------------------------|-----------------------------------------------------------------------------------------------------------------------------------------------------------------------------|
| Initiate Ventral                               | Infant initiates ventral contact with mother.                                                                                                                               |
| Receive Ventral                                | Infant receives ventral contact from mother.                                                                                                                                |
| Mutual Ventral Contact                         | Sustained ventral-ventral contact between mother and infant.                                                                                                                |
| Initiate Contact                               | Infant initiates contact with mother, except ventral, groom or nipple.                                                                                                      |
| Receive Contact                                | Infant receives contact from mother, except ventral, groom or nipple.                                                                                                       |
| Nipple Contact                                 | Oral contact by infant with mother's nipple.                                                                                                                                |
| Nipple Withdraw                                | Mother withdraws nipple from infant.                                                                                                                                        |
| Initiate Groom                                 | The infant picks at and/or spreads the fur of the mother.                                                                                                                   |
| Receive Groom                                  | The mother picks at and/or spreads the fur of the infant.                                                                                                                   |
| Self Contact                                   | Self directed behavior (e.g., self groom, self scratch, self mouth, self sex, excluding self aggressive behavior).                                                          |
| Self Aggression                                | Self directed aggressive behavior (e.g., self bite).                                                                                                                        |
| Stereotypy                                     | Any repetitive, patterned and rhythmic movement maintained for at least 3 cycles. This includes idiosyncratic non-locomotor stereotyped actions, independent of locomotion. |
| Environmental Explore                          | Any oral, pedal, or manual manipulation or exploration of the environment, excluding eating, drinking, and stereotypy.                                                      |
| Environmental Eating                           | Infant is actively mouthing, chewing on food (chow, fruit, or nuts).                                                                                                        |
| Environmental Drinking                         | Infant has mouth on water spicket and seems to be drinking.                                                                                                                 |
| Locomotion                                     | Any self-induced movement through space by walking, jumping, climbing, or swinging.                                                                                         |
| Play                                           | Mutual rough/tumble activity with or without locomotion, and/or chase, and/or play face.                                                                                    |
| Inactive                                       | Subject is not engaged in any scored activity, social behavior, and/or appears to be sleeping.                                                                              |
| Behaviors Measured for Frequency of Occurrence |                                                                                                                                                                             |
| Vocalization                                   | Any vocal sound, cooing, screeching, chirping, barking, or screaming.                                                                                                       |
| Fear-submit to mother                          | Any fearful behavior directed toward mother, fear grimace, oriented withdraw, yield, crouch-submit.                                                                         |
| Fear-submit to other                           | Any fearful behavior directed toward observer or other monkeys, fear grimace, oriented withdraw, yield, crouch-submit.                                                      |
| Hostility toward other                         | Any hostile behavior such as threats, barking or cage shaking directed at the examiner or at another animal in the room.                                                    |
| Mother rejects                                 | Mother breaks contact with infant, when infant tries to establish contact or maintain contact.                                                                              |
| Mother retrieves                               | Infant breaks contact and moves away and mother re-establishes contact.                                                                                                     |

## Magnetic Resonance Imaging Parameters

MRI scans were obtained at the Waisman Laboratory for Brain Imaging and Behavior. Imaging was performed on a GE SIGNA 3T scanner (General Electric Medical Systems, Milwaukee, WI) with a high resolution coronal 3D, Inversion-Recovery (IR)-Prepped, fast SPGR sequence for the T1-weighted scan (TI = 600ms; TR = 8.6ms, TE = 2.0ms, FOV = 14cm, flip angle = 10°, matrix = 256 x 256 (interpolated to 512 x 512), slice thickness = 1mm (interpolated to 0.5mm), bandwidth = +/-15.63 kHz) which yielded a continuous voxel size of 0.273 x 0.273 x 0.5mm across the entire cranium. A T2-weighted scan (TR = 12,000msec, TE = 90msec, FOV = 14cm, flip angle = 90°, 256 x 256 (interpolated to 512 x 512), voxel size = 0.2734mm, slice thickness = 1.5mm, slice gap = 0mm, bandwidth = 31.25) provided a continuous voxel size of 0.2734 x 0.2734 x 1.5mm across the entire cranium. T1 and T2 weighted scans were aligned using a 3-plane localizer during the scanning session.

**Table S2. Group Comparisons for Subcortical Region Volumes**

| Region      | Control (Mean ± SE) |          | Influenza (Mean ± SE) |          | P Value<br>Uncorrected | P Value ICV<br>Corrected |
|-------------|---------------------|----------|-----------------------|----------|------------------------|--------------------------|
|             | Left                | Right    | Left                  | Right    |                        |                          |
| Amygdala    | 402 ± 16            | 405 ± 18 | 386 ± 9               | 381 ± 9  | 0.036*                 | 0.477                    |
| Hippocampus | 423 ± 9             | 413 ± 12 | 402 ± 9               | 399 ± 8  | 0.136                  | 0.778                    |
| Caudate     | 619 ± 22            | 605 ± 20 | 597 ± 15              | 599 ± 15 | 0.540                  | 0.208                    |
| Putamen     | 914 ± 26            | 914 ± 26 | 875 ± 18              | 878 ± 17 | 0.077                  | 0.846                    |

Significant group differences are shown (\* indicates p-values below .05) with and without correcting for intracranial volumes (brain region divided by ICV). Control  $n = 7$ , Influenza  $n = 12$ . Data are presented as raw means ( $\text{mm}^3$ ) ± SE.
